# Supplementary material for: Novel polar oxides with exceptional pyroelectric performance: doping-induced polar transition in Ba 6 Pb 3.2 (PO 4 ) 6 Cl 2
Source: Royal Society of Chemistry journal article supplement (doi:10.1039/d4ta06308b), 2024-01-01
Supplement: d4ta06308b1.pdf [file d4ta06308b1.pdf]

## Supporting Information

Duo Zhang<sup>a</sup>, Ruijin Sun<sup>a\*</sup>, Zhaolong Liu<sup>b</sup>, Haodong Li<sup>a</sup>, Munan Hao<sup>b</sup>, Yuxin Ma<sup>b</sup>, Ke Ma<sup>b</sup>, Dezhong Meng<sup>a</sup>, Zhiyuan Zheng<sup>a</sup>, Yibo Xu<sup>a</sup>, Xu Chen<sup>b</sup>, Qiu Fang<sup>b</sup>, Xuefeng Wang<sup>b</sup>, Linjie Dai<sup>c</sup>, Changchun Zhao<sup>a\*</sup>, Shifeng Jin<sup>b</sup>

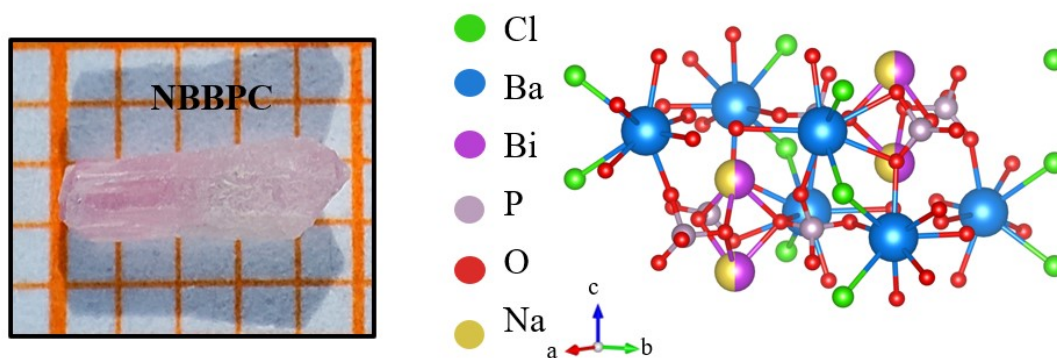

S1. BBNPC crystal samples and structure.

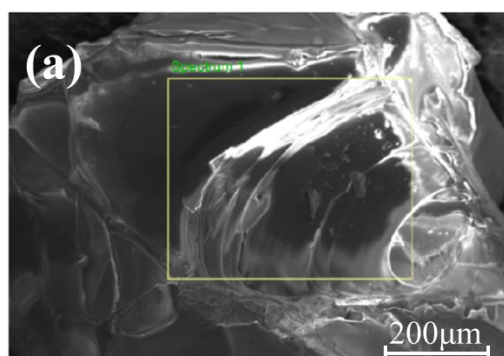

| Spectrum   | O     | Na   | P     | Cl   | Ba   | Bi   |
|------------|-------|------|-------|------|------|------|
| Spectrum 1 | 70.87 | 4.41 | 10.21 | 3.47 | 7.90 | 3.15 |

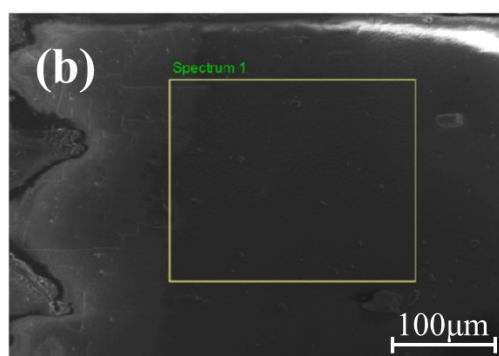

| Spectrum   | O     | Na   | Si   | P    | Cl   | Ba   | Bi   |
|------------|-------|------|------|------|------|------|------|
| Spectrum 1 | 75.38 | 4.06 | 0.13 | 8.85 | 2.90 | 5.97 | 2.71 |

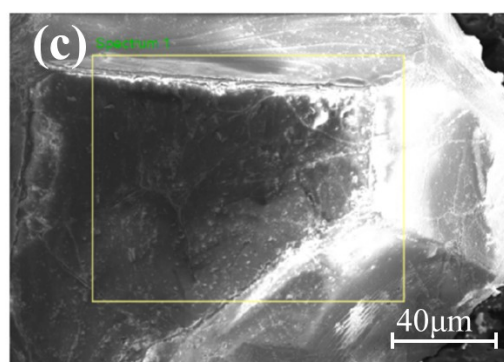

| Spectrum   | O     | Na   | Si   | P     | Cl   | Ba    | Pb   |
|------------|-------|------|------|-------|------|-------|------|
| Spectrum 1 | 66.58 | 3.07 | 0.42 | 10.24 | 3.49 | 10.58 | 5.62 |

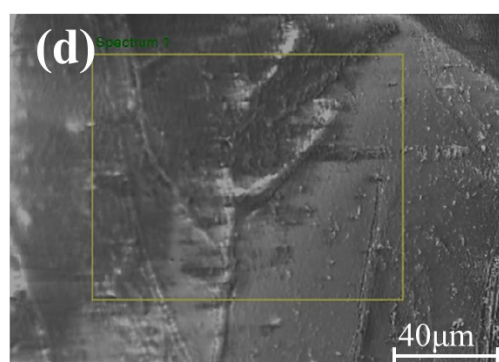

| Spectrum   | O     | Na   | Si   | P     | Cl   | Ba    | Pb   |
|------------|-------|------|------|-------|------|-------|------|
| Spectrum 1 | 55.97 | 6.06 | 0.72 | 12.71 | 4.14 | 13.68 | 6.72 |

S2. (a) & (b) SEM morphology and EDS elemental content of BBPNC. (c) & (d) SEM morphology and EDS elemental content of BPPC.

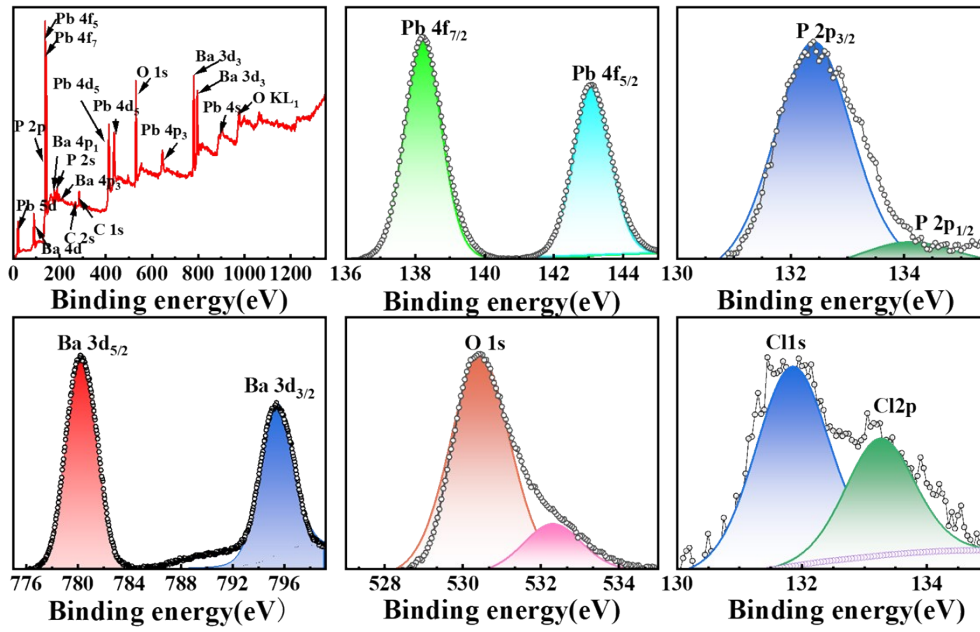

S3.BPPCXPS data.

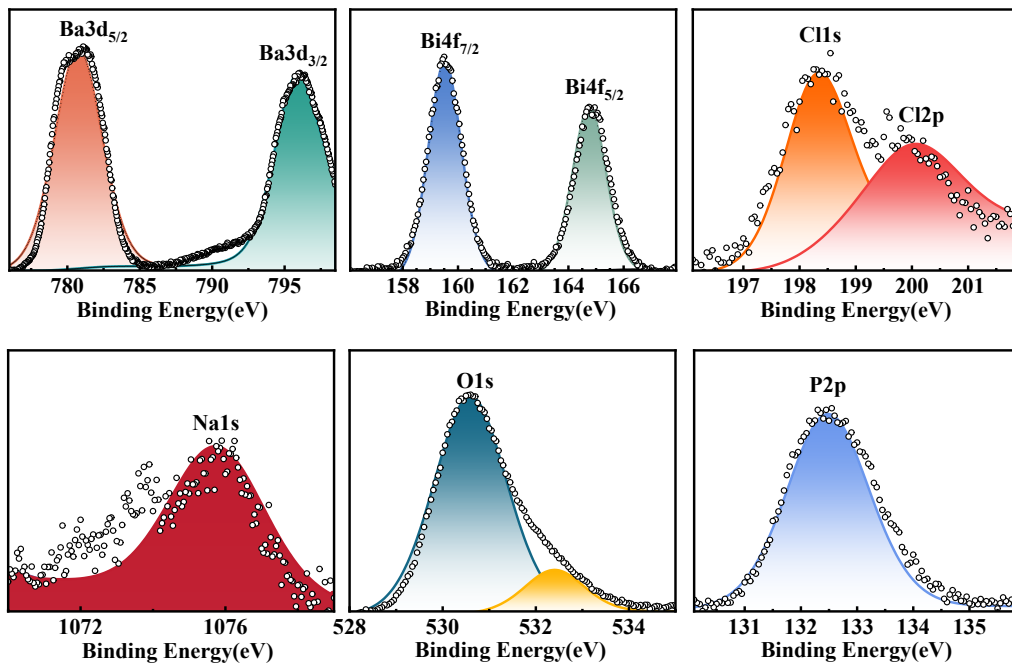

S4.BBNPCXPS data.

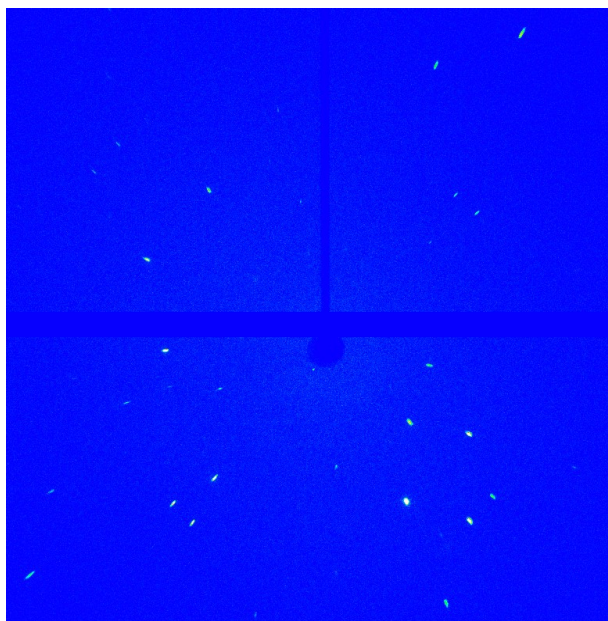

**S5.[001] Directional single-crystal diffraction spots.**

**Tabel.S1 Cell parameters of  $\text{Ba}_6\text{Pb}_{3.2}\text{P}_6\text{O}_{24}\text{Cl}_2$ .**

| <b>Formula</b>                                         | <b><math>\text{Ba}_6\text{Pb}_{3.2}\text{P}_6\text{O}_{24}\text{Cl}_2</math></b> |
|--------------------------------------------------------|----------------------------------------------------------------------------------|
| <b>fw</b>                                              | 2080.11                                                                          |
| <b>Space group</b>                                     | $P6_3$                                                                           |
| <b>a, Å</b>                                            | 10.2299                                                                          |
| <b>b, Å</b>                                            | 10.2299                                                                          |
| <b>c, Å</b>                                            | 7.5680                                                                           |
| <b><math>\alpha, \beta, \text{deg}</math></b>          | 90                                                                               |
| <b><math>\gamma, \text{deg}</math></b>                 | 120                                                                              |
| <b>V, Å<sup>3</sup></b>                                | 685.89                                                                           |
| <b>Z</b>                                               | 1                                                                                |
| <b><math>D_{\text{calcd}}, \text{g cm}^{-3}</math></b> | 5.036                                                                            |
| <b>GOF on F<sup>2</sup></b>                            | 1.068                                                                            |
| <b>R1, wR2 [I &gt; 2s (I)]</b>                         | 0.0528, 0.0984                                                                   |
| <b>R1, wR2 (all data)</b>                              | 0.0343, 0.1008                                                                   |

Tabel.S2 Cell parameters of  $\text{Ba}_6\text{Bi}_2\text{Na}_2\text{P}_6\text{O}_{24}\text{Cl}_2$ .

| Formula                              | $\text{Ba}_6\text{Bi}_2\text{Na}_2\text{P}_6\text{O}_{24}\text{Cl}_2$ |
|--------------------------------------|-----------------------------------------------------------------------|
| fw                                   | 1928.70                                                               |
| Space group                          | $P6_3$                                                                |
| a, Å                                 | 10.0732                                                               |
| b, Å                                 | 10.0732                                                               |
| c, Å                                 | 7.4666                                                                |
| $\alpha, \beta, \text{deg}$          | 90                                                                    |
| $\gamma, \text{deg}$                 | 120                                                                   |
| V, Å <sup>3</sup>                    | 656.13                                                                |
| Z                                    | 1                                                                     |
| $D_{\text{calcd}}, \text{g cm}^{-3}$ | 4.881                                                                 |
| GOF on F <sup>2</sup>                | 1.086                                                                 |
| R1, wR2 [I > 2s (I)]                 | 0.0419, 0.0911                                                        |
| R1, wR2 (all data)                   | 0.0373, 0.0938                                                        |

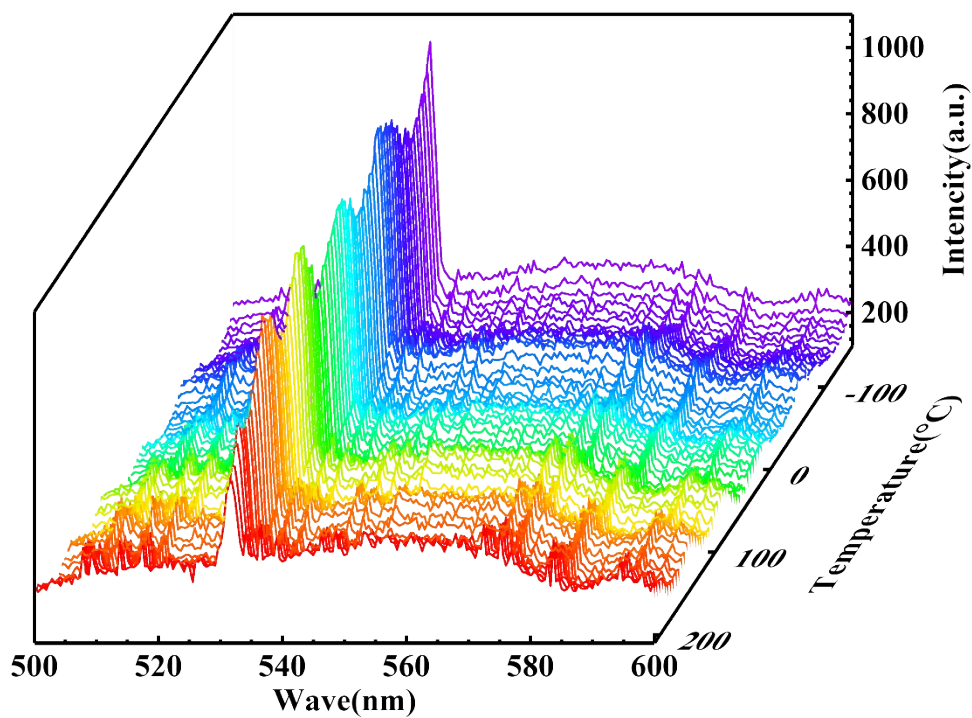

S6.SHG signal strength of BPPC in the 500-600 nm interval under 200-400 K.

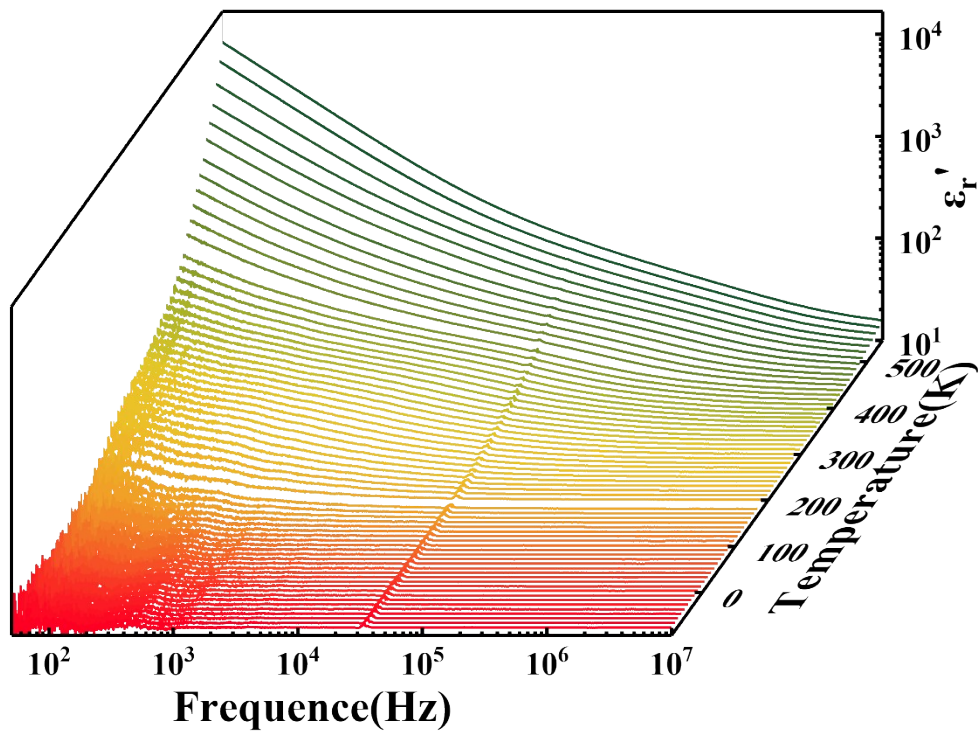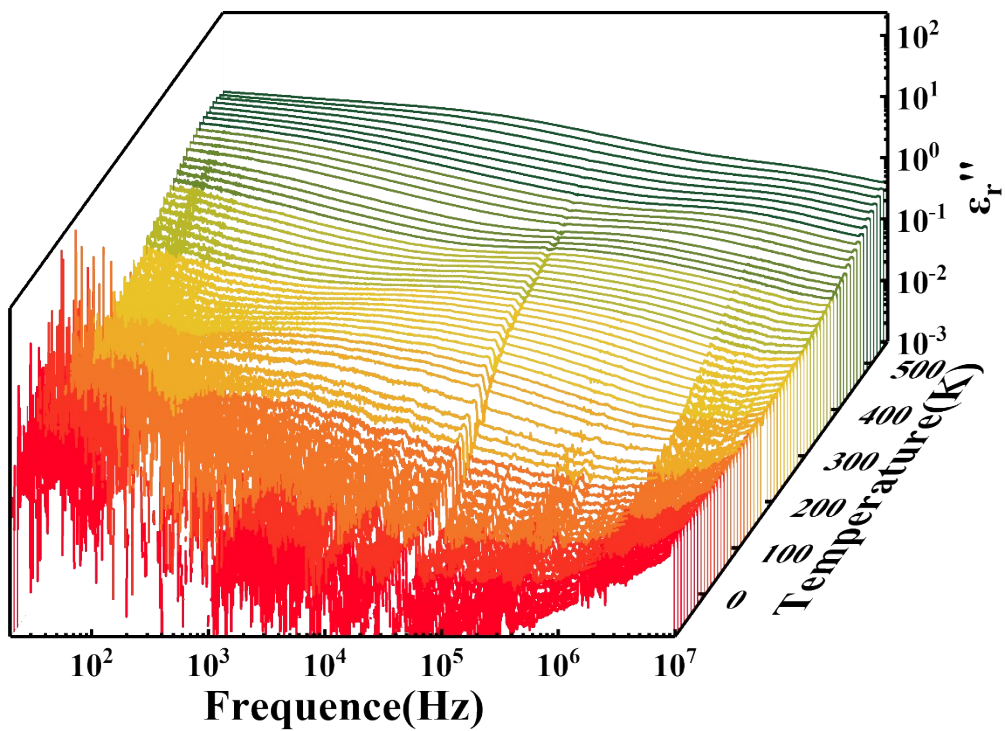

S7. (a) & (b)BPPC frequency dependence curve of real and imaginary parts of dielectric constant at 170-800 K.

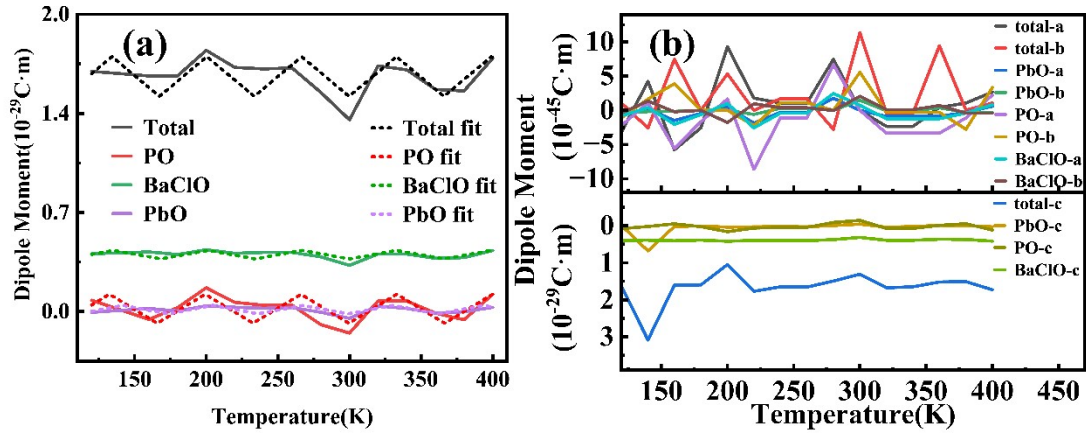

S8. (a) Calculation of electric dipole moments and Fourier triangular wave fitting of dipole moment vibrations for single crystal tests at 20 K intervals from 120-400 K. (b) The electric dipole moment components in directions a, b, and c are calculated for single crystal experiments at intervals of 20 K in the range of 120-400 K.

Table S3.  $P6_3/m$  simulation of structural atomic positions

| Atom( $P6_3/m$ ) | x (Å)   | Y(Å)    | z (Å)   | Occ  | Site |
|------------------|---------|---------|---------|------|------|
| Pb               | 0.33333 | 0.66667 | 0.00002 | 0.80 | 4f   |
| Ba               | 0.26025 | 0.25160 | 0.25000 | 1.00 | 6h   |
| P                | 0.03710 | 0.41040 | 0.25000 | 1.00 | 6h   |
| Cl               | 0.00000 | 0.00000 | 0.00000 | 1.00 | 2b   |
| O                | 0.48460 | 0.13540 | 0.25000 | 1.00 | 6h   |
| O                | 0.12530 | 0.58590 | 0.25000 | 1.00 | 6h   |
| O                | 0.08760 | 0.35850 | 0.08450 | 1.00 | 12i  |

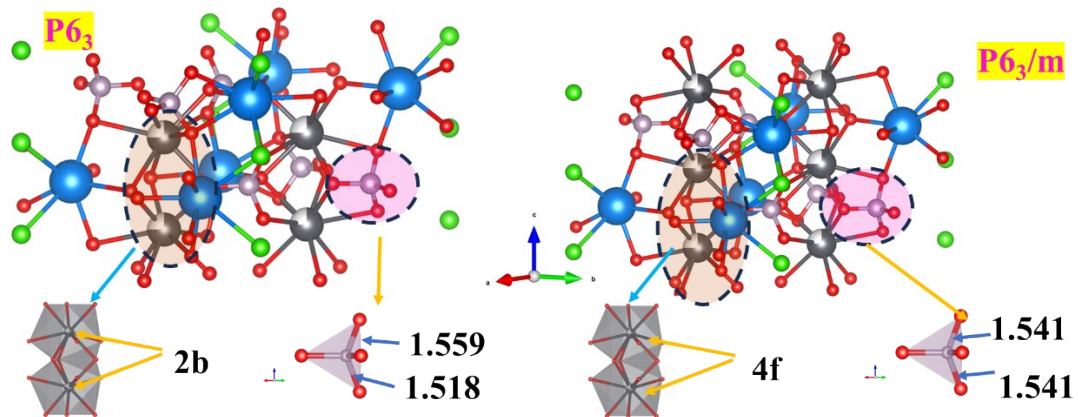

S9.  $P6_3$  vs.  $P6_3/m$  space group comparison.

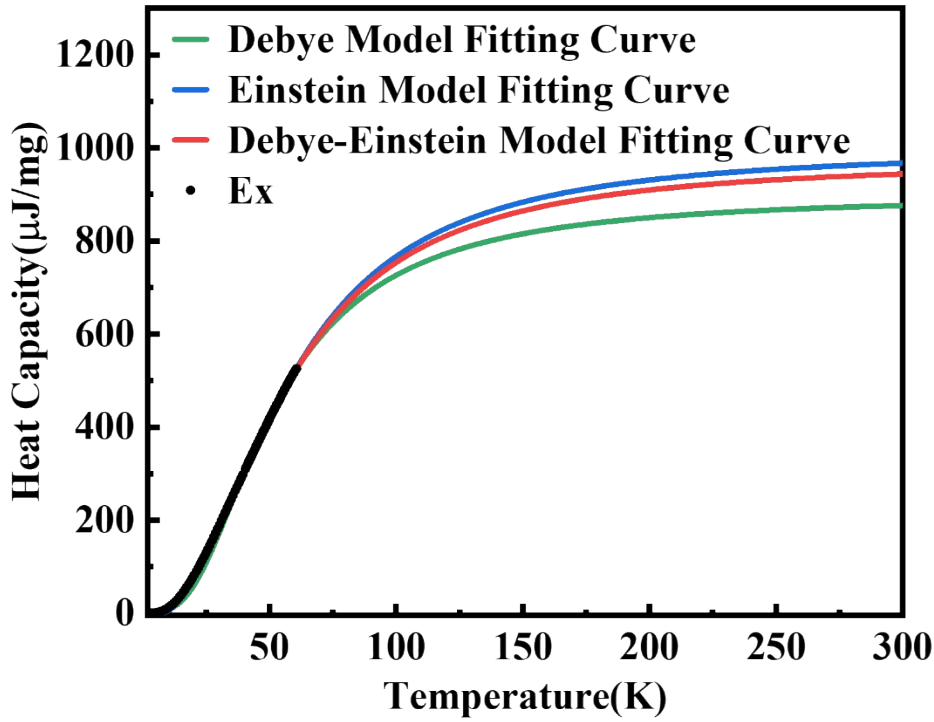

**S10. Debye model, Einstein model, Debye-Einstein model specific heat fitting structure.**

The Debye-Einstein Model various fitting parameters (1):

$$C_p$$

$$= 9aNR \left( \frac{T}{\theta_{Debye}} \right)^3 \int_0^{\frac{\theta_{Debye}}{T}} e^T \frac{T^4}{(e^T - 1)^2} + (1-a)b3NR \left( \frac{\theta_{E1}}{T} \right)^2 e^{\left( e^{\frac{\theta_{E1}}{T}} - 1 \right)^2} + (1-a)(1-b)3NR \left( \frac{\theta_{E2}}{T} \right)^2 e^{\left( e^{\frac{\theta_{E2}}{T}} - 1 \right)^2}$$

(1)

Where  $N$ ,  $\theta_{Debye}$  and  $\theta_{E1(E2)}$  are Avogadro number, characteristic Debye temperature and characteristic Einstein temperature respectively. The parameter  $a$  is the proportion of Debye model. The parameter  $b$  is the proportion of Einstein model.

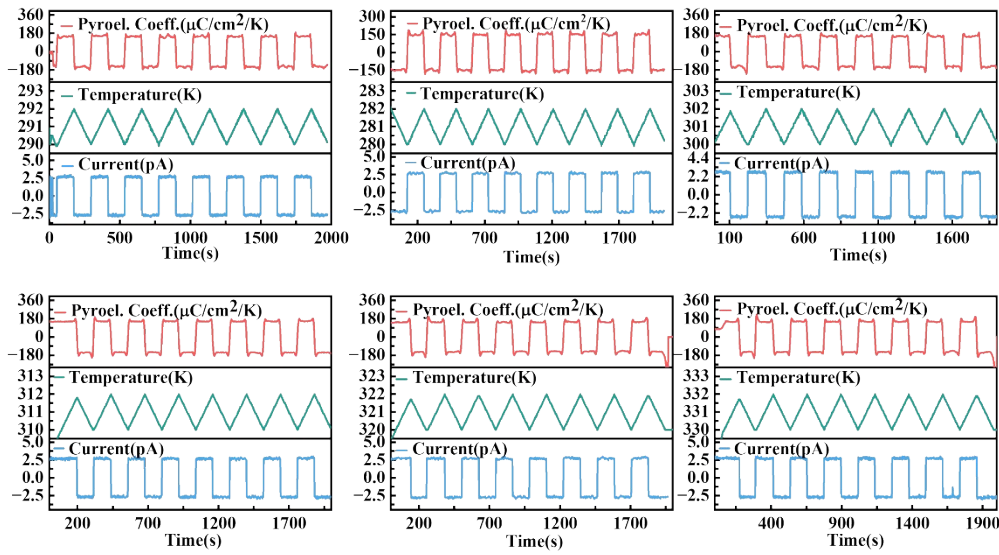

### S11. Circulating current response and pyroelectric coefficient at different temperatures

**Table S4. Comparison of room-temperature pyroelectric-related properties between BPPC and other famous inorganic pyroelectrics.**

where  $F_i = p_s / C_v$ ,  $F_v = p_s / \epsilon' C_v$ ,  $F_D = p_s / C_v (\epsilon' \tan \delta)^{1/2}$ ,  $F_E = p_s^2 / \epsilon' (C_v)^2$

| Materials                                                  | $p_s$<br>$\mu\text{C}/\text{m}^2/\text{K}$ | $C_v$<br>$\text{MJ}/\text{m}^3/\text{K}$ | $\epsilon'$<br>(10<br>kHz) | $\tan \delta$<br>(10<br>kHz) | $F_i$<br>$10^{-10}$<br>m/V | $F_v$<br>$\text{m}^2/\text{C}$ | $F_D$<br>$10^{-5}$<br>$\text{Pa}^{1/2}$ | $F_E$<br>$10^{-11}$<br>$\text{m}^3/\text{J}$ |
|------------------------------------------------------------|--------------------------------------------|------------------------------------------|----------------------------|------------------------------|----------------------------|--------------------------------|-----------------------------------------|----------------------------------------------|
| BPPC                                                       | 108                                        | 1.475                                    | 10.47                      | 0.002                        | 0.732                      | 0.7                            | 4.935                                   | 5.12                                         |
| LiTaO <sub>3</sub> <sup>1</sup>                            | 190                                        | 3.2                                      | 47                         | 0.005                        | 0.59                       | 0.14                           | 1.22                                    | 0.75                                         |
| PZT <sup>2</sup>                                           | 350                                        | 3.2                                      | 471                        | 0.005                        | 1.09                       | 0.026                          | 0.71                                    | 0.25                                         |
| LiNbO <sub>3</sub> <sup>1</sup>                            | 96                                         | 2.7                                      | 31                         |                              | 0.35                       | 0.14                           |                                         | 0.41                                         |
| BaTiO <sub>3</sub> <sup>3</sup>                            | 200                                        | 2.5                                      | 1200                       |                              | 0.8                        | 0.008                          |                                         | 0.53                                         |
| ZnO <sup>4</sup>                                           | 9.4                                        | 3.1                                      | 11                         |                              | 0.03                       | 0.03                           |                                         | 0.08                                         |
| Li <sub>2</sub> B <sub>4</sub> O <sub>7</sub> <sup>5</sup> | 30                                         | 3.3                                      | 2                          | 0.03                         | 0.09                       | 0.53                           | 0.37                                    | 0.93                                         |
| SBN <sup>5</sup>                                           | 550                                        | 2.2                                      | 400                        | 0.003                        | 2.48                       | 0.07                           | 2.26                                    | 1.74                                         |
| NaNO <sub>2</sub> <sup>5</sup>                             | 40                                         | 2.2                                      | 4                          |                              | 0.182                      | 0.514                          |                                         | 0.93                                         |
| PMN-                                                       | 980                                        | 2.44                                     | 650                        | 0.000                        | 4.02                       | 0.062                          | 7.05                                    | 2.5                                          |
| 28PT :                                                     |                                            |                                          |                            | 5                            |                            |                                |                                         |                                              |
| Mn <sup>6</sup>                                            |                                            |                                          |                            |                              |                            |                                |                                         |                                              |
| 34PIN-                                                     | 705                                        | 2.5                                      | 525                        | 0.002                        | 2.82                       | 0.054                          | 2.75                                    | 1.5                                          |
| 34PMN-                                                     |                                            |                                          |                            |                              |                            |                                |                                         |                                              |
| 32PT <sup>6</sup>                                          |                                            |                                          |                            |                              |                            |                                |                                         |                                              |

1. A. Bartasyte, S. Margueron, T. Baron, S. Oliveri and P. Boulet, *Advanced Materials Interfaces*, 2017, **4**, 1600998.
2. S. Zhang and F. Li, *Journal of Applied Physics*, 2012, **111**.



3. M. Acosta, N. Novak, V. Rojas, S. Patel, R. Vaish, J. Koruza, G. Rossetti and J. Rödel, *Applied Physics Reviews*, 2017, **4**.
4. M. C. Larciprete and M. Centini, *Applied Physics Reviews*, 2015, **2**.
5. X. Li, S.-G. Lu, X.-Z. Chen, H. Gu, X.-s. Qian and Q. Zhang, *Journal of Materials Chemistry C*, 2013, **1**, 23-37.
6. P. Yu, Y. Ji, N. Neumann, S.-g. Lee, H. Luo and M. Es-Souni, *IEEE transactions on ultrasonics, ferroelectrics, and frequency control*, 2012, **59**, 1983-1989.
